# Supplementary material for: Intracellular pH dynamics respond to extracellular matrix stiffening and mediate vasculogenic mimicry through β-catenin
Source: PubMed Central journal article supplement — bioRxiv. 2025 Jun 25:2024.06.04.597454. Originally published 2024 Jun 4. Preprint. [Version 2] doi: 10.1101/2024.06.04.597454 (PMC11185592; doi:10.1101/2024.06.04.597454), 2025-06-25
Supplement: media-1.pdf [file media-1.pdf]

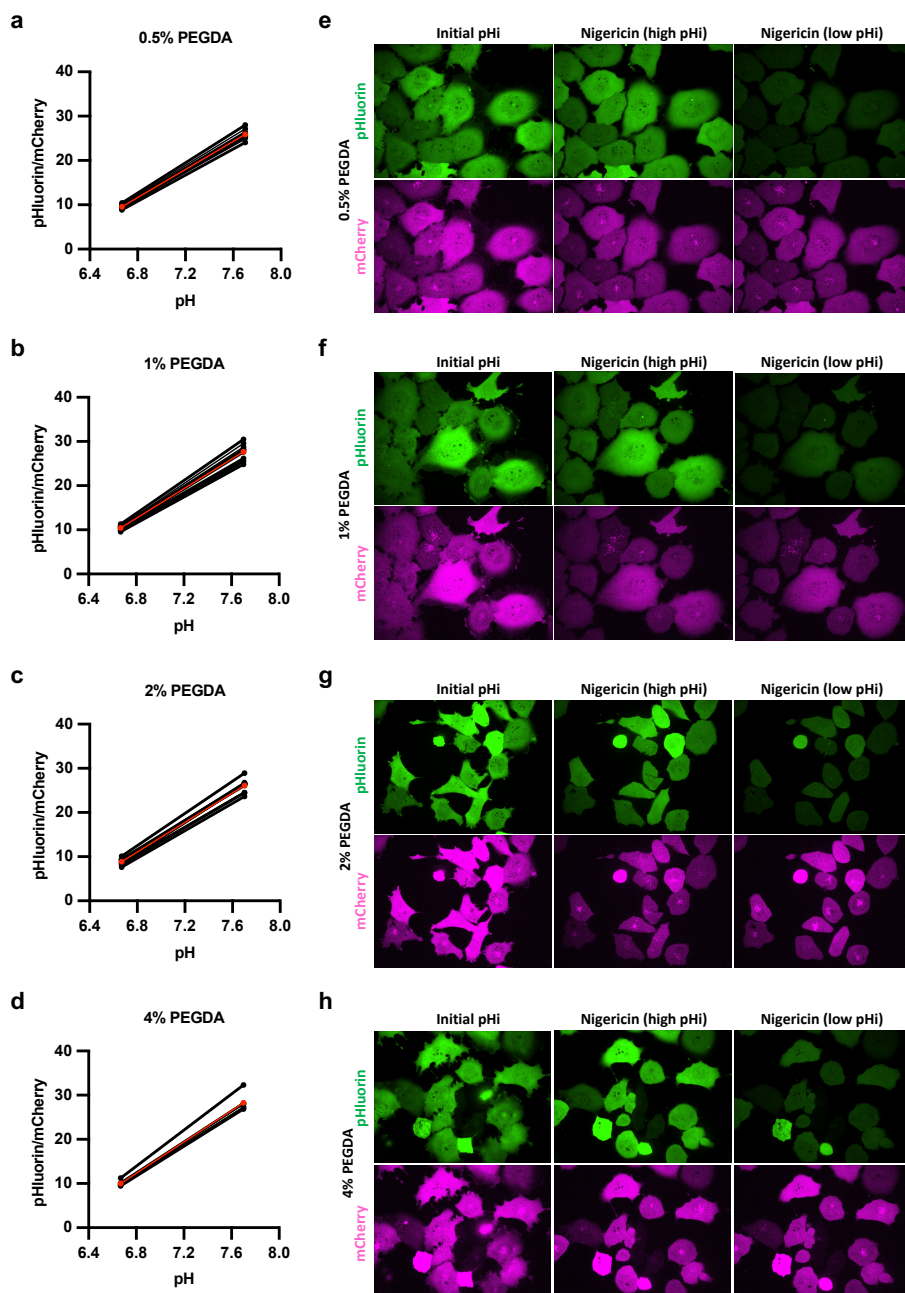

**Supplement Figure 1: Nigericin standardization of mCherry-pHluorin biosensor in H1299 cells.** Nigericin standard linear regressions across a single replicate for each single cell (black) and mean (red) for H1299-mCherry-pHluorin plated on **a**) 0.5% PEGDA (n=10), **b**) 1% PEGDA (n=10), **c**) 2% PEGDA (n=13), **d**) 4% PEGDA (n=7) HA gels. Single channel images of pHluorin (green) and mCherry (magenta) fluorescence at initial pHi imaging, high nigericin, and low nigericin standardizations for **e**) 0.5% PEGDA, **f**) 1% PEGDA, **g**) 2% PEGDA, **h**) 4% PEGDA. LUTs are identical across each cell line. Note that in all cases, single-cell nigericin standard curves were used to back-calculate single-cell pHi.

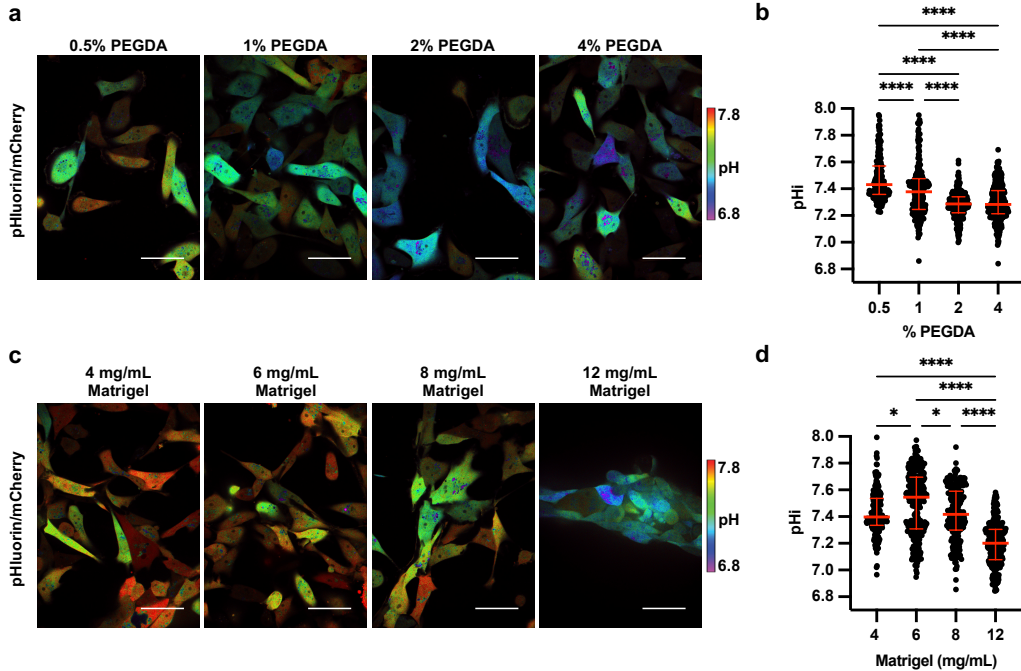

**Supplement Figure 2: Stiffening extracellular matrix lowers pHi in metastatic human breast carcinoma (MDA-MB-231).** **a)** Representative images of MDA-MB-231 cells stably expressing mCherry-pHluorin pH biosensor plated on varying HA gel stiffnesses. Images show ratiometric display of pHluorin/mCherry fluorescence. Scale bars: 50  $\mu$ m. **b)** Quantification of single-cell pHi data collected as shown in (a) (n=3 biological replicates, n=194 0.5% PEGDA, n=228 1% PEGDA, n=265 2% PEGDA, n=334 4% PEGDA. Red lines show medians  $\pm$  IQR). **c)** Representative images of MDA-MB-231 cells stably expressing mCherry-pHluorin pH biosensor plated on varying Matrigel stiffnesses. Images show ratiometric display of pHluorin/mCherry fluorescence. Scale bars: 50  $\mu$ m. **d)** Quantification of single-cell pHi data collected as shown in (c) (n=3 biological replicates, n=210 4mg/mL, n=291 6mg/mL, n=222 8mg/mL, n=292 12mg/mL. Red lines show medians  $\pm$  IQR). For (c) and (d), significance was determined by a Kruskal-Wallis test (\*\*\*\*P<0.0001).

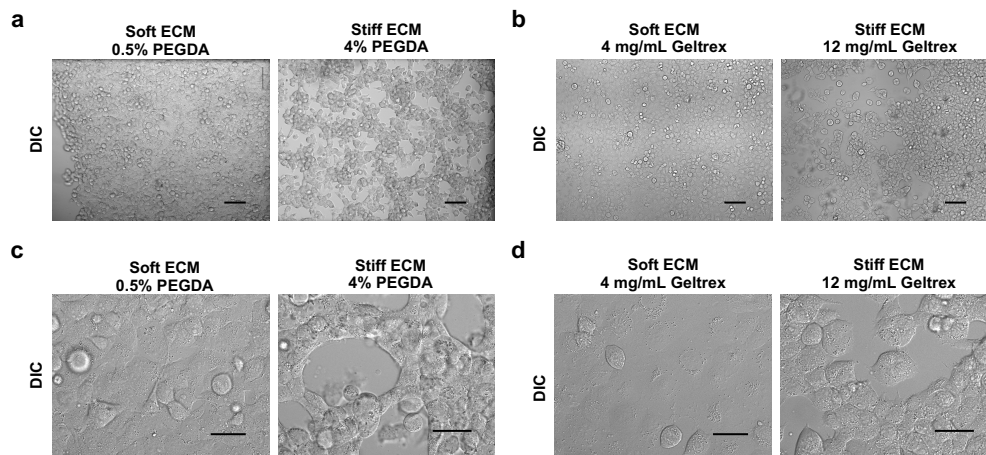

**Supplement Figure 3: Representative images of Vasculogenic mimicry phenotype on soft and stiff Geltrex and HA gels.** **a)** Differential interference contrast (DIC) images of H1299 cells plated on soft (0.5% PEGDA) and stiff (4% PEGDA) HA gels. Scale bars: 100  $\mu\text{m}$ . **b)** Differential interference contrast (DIC) images of H1299 cells plated on soft (4mg/mL) and stiff (12 mg/mL) Geltrex gels. Scale bars: 100  $\mu\text{m}$ . **c)** Differential interference contrast (DIC) images of H1299 cells plated on soft (0.5% PEGDA) and stiff (4% PEGDA) HA gels. Scale bars: 50  $\mu\text{m}$ . **d)** Differential interference contrast (DIC) images of H1299 cells plated on soft (4mg/mL) and stiff (12 mg/mL) Geltrex gels. Scale bars: 50  $\mu\text{m}$ .

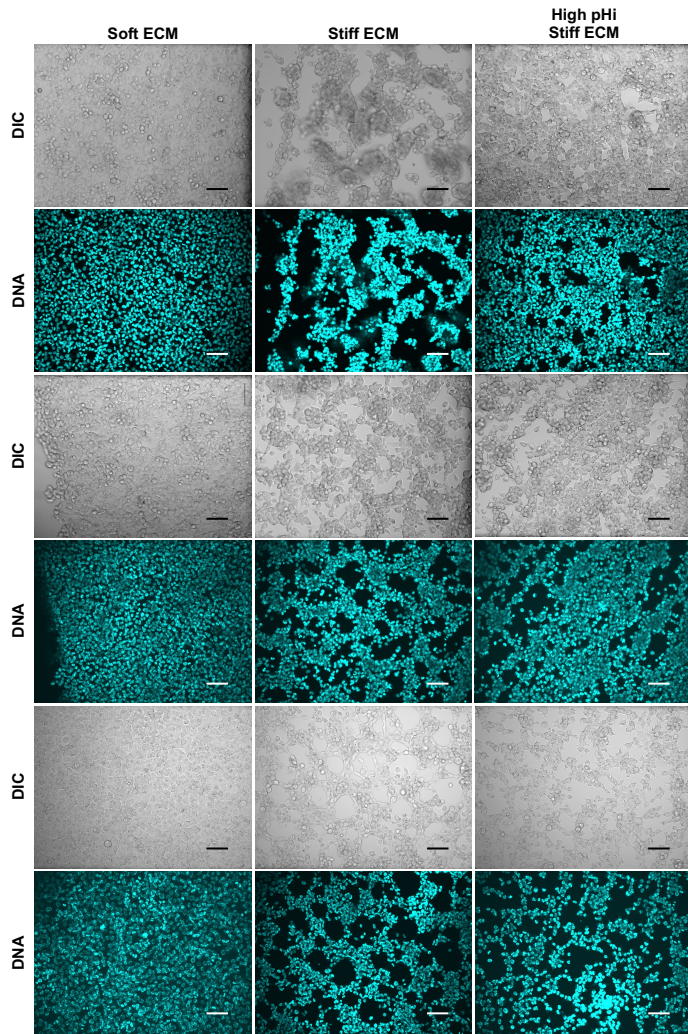

**Supplement Figure 4: Additional representative images of Vasculogenic mimicry phenotype on HA gels.** Differential interference contrast (DIC) and Hoechst stain (DNA, cyan) images of H1299 cells plated on soft (0.5% PEGDA), stiff (4% PEGDA), and stiff (4% PEGDA) with high pHi HA gels. Scale bars: 100  $\mu$ m.

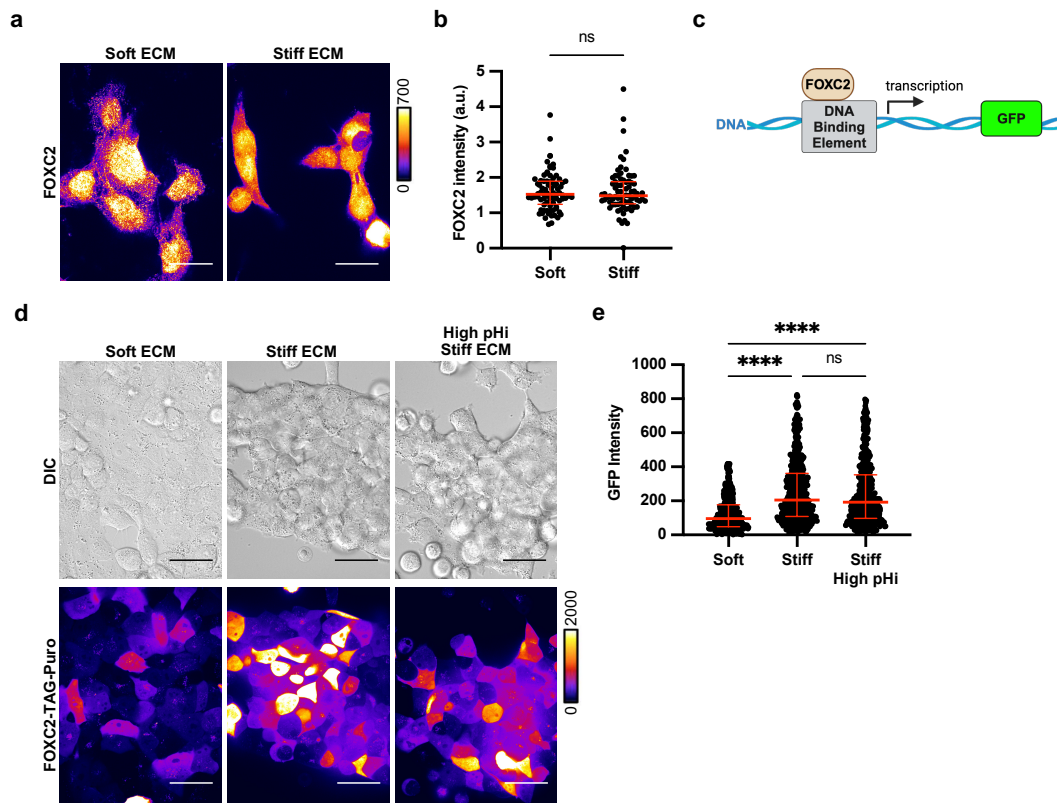

**Supplement Figure 5. FOXC2 has stiffness-dependent activity that is insensitive to pHi.** **a)** Representative images of H1299 cells plated on soft (4 mg/mL) and stiff (12 mg/mL) Geltrex fixed and stained for FOXC2. FOXC2 is pseudocolored according to scale. Scale bars: 50  $\mu$ m. **b)** Quantification of FOXC2 intensity per cell collected as shown in (a) ( $n=3$  biological replicates,  $n=80$  soft and  $n=77$  stiff). Red lines show medians  $\pm$  IQR. **c)** Schematic of FOXC2-TAG-Puro reporter of FOXC2 transcriptional activity. **d)** Representative images of H1299 cells plated on soft (0.5% PEGDA), stiff (4% PEGDA) and stiff (4% PEGDA) with raised pHi HA gels. Images show Brightfield display (DIC) and FOXC2-TAG-Puro. FOXC2-TAG-Puro is pseudocolored according to scale. Scale bars: 50  $\mu$ m. **e)** Quantification of FOXC2-TAG-Puro intensity per cell collected as shown in (d) ( $n=3$  biological replicates,  $n=416$  soft,  $n=478$  stiff,  $n=461$  stiff high pHi). Red lines show medians  $\pm$  IQR).

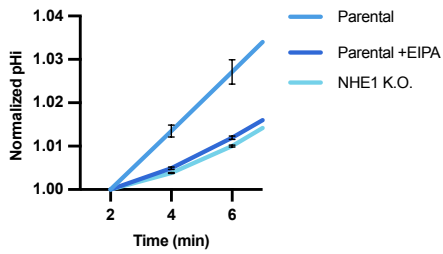

**Supplement Figure 6: NHE1 activity is decreased in H1299 cells with CRISPR knockout of NHE1.** Normalized pHi recovery measurements after acid load of parental H1299 cells (see methods) and H1299 cells where NHE1 has been removed via CRISPR (H1299-NHE1 K.O., see methods). Recovery assays were performed with and without the presence of a specific NHE1 inhibitor (EIPA). (n=2 biological replicates; n=6 H1299 parental, n=6 H1299 parental +EIPA, n=6 H1299 NHE1 K.O. -EIPA); (means  $\pm$  SEM).
